# Supplementary material for: A novel method to enhance the conductance of transitional metal oxide electrodes
Source: Royal Society of Chemistry journal article supplement (doi:10.1039/c3nr05880h), 2014-01-01
Supplement: c3nr05880h.pdf [file c3nr05880h.pdf]

Supplementary Material (ESI) for Nanoscale  
This journal is (c) The Royal Society of Chemistry 2010

## **Supplementary Information**

### **A Novel Method to Enhance the Conductance of Transitional Metal Oxide Electrodes**

***Ranran Wang,<sup>ab</sup> Zheng Chen,<sup>b</sup> Hang Yu,<sup>b</sup> Xilai Jia,<sup>b</sup> Lian Gao,<sup>a</sup> Jing  
Sun<sup>\*a</sup> Robert F. Hicks<sup>\*b</sup> and Yunfeng Lu<sup>\*b</sup>***

*<sup>a</sup>The State Key Lab of High Performance Ceramics and Superfine Microstructure,  
Shanghai Institute of Ceramics, Chinese Academy of Sciences, 1295 Ding Xi Road,  
Shanghai 200050, China*

*E-mail: [jingsun@mail.sic.ac.cn](mailto:jingsun@mail.sic.ac.cn); Fax: +86 21 52413122; Tel: +86 21 52414301;*

*<sup>b</sup>Department of Chemical and Biomolecular Engineering, University of California,  
Los Angeles, 405 Hilgard Avenue, Los Angeles, California, USA, 90095*

*Email: [hlucla@ucla.edu](mailto:hlucla@ucla.edu) (Y. F. Lu) [rhicks@ucla.edu](mailto:rhicks@ucla.edu) (R. F. Hicks)*

### **Experimental Methods**

***Synthesis of the ultralong Cu nanowires and CuO nanotubes:*** The method to synthesize ultralong copper nanowires was reported in our previous work.<sup>17</sup> Typically, 8 g n-hexadecylamine (HDA) was melted at 180 °C, and 0.5 g hexadecyltrimethyl ammonium bromide (CTAB) was dissolved into it. Then, 0.2 g copper acetylacetonate was added and stirred until homogeneous blue solution formed. After that, the solution was transferred to a Teflon autoclave, and a 0.5 cm<sup>2</sup> silicon wafer sputtered with platinum was put in. Then the autoclave was put in a 180 °C oven and held for 10 h. After reaction, the autoclave cooled down to room temperature in air, and the

Supplementary Material (ESI) for Nanoscale  
This journal is (c) The Royal Society of Chemistry 2010

products were rinsed with toluene thoroughly. Finally, thread-like reddish product was obtained and kept in toluene. After annealed at 300 °C in air for 30 min, CuO nanotubes were obtained. X-ray diffraction measurements were taken on a Panalytical X'Pert Pro X-ray powder diffractometer using Cu-K $\alpha$  radiation ( $\lambda = 1.54 \text{ \AA}$ ). SEM experiments were conducted on a Jeol JSM-6700 FE-SEM instrument. TEM experiments were conducted on a Philips CM120 instrument operated at 120 kV.

***Electrode fabrication and electrochemical measurement:*** To prepare working electrodes, CuO nanotubes or a mixture of CuO nanotubes and MWNTs at a weight ratio of 7:1 was pasted on a titanium sheet, and dried at 100 °C under vacuum for 12 h. The electrodes were put on a hot plate of 250 °C and treated with atmospheric pressure H<sub>2</sub> plasma generated by Atomflow<sup>TM</sup> 400L from Surfex<sup>®</sup> Technologies LLC. To make 2032 type coin cells, glass fiber (GF/D) from Whatman was used as the separator. The electrolyte consisted of a solution of 1 M LiPF<sub>6</sub> in ethylene carbonate (EC)/dimethyl carbonate (DMC) (1:1 v/v). Lithium foil was used as counter electrodes. The cells were assembled in a glove-box under an argon atmosphere. The charge and discharge measurements were carried out by LAND CT2000 (Wuhan Jinnuo Electronics, Ltd., Wuhan, China) in the voltage range of 0.005-3V (vs. Li<sup>+</sup>/Li) under different current densities. The specific capacitance was calculated based on the total mass of anode materials. CV measurements and the electrochemical impedance spectroscopy (EIS) recorded on a Solartron 1860/1287 Electrochemical Interface.

Supplementary Material (ESI) for Nanoscale  
This journal is (c) The Royal Society of Chemistry 2010

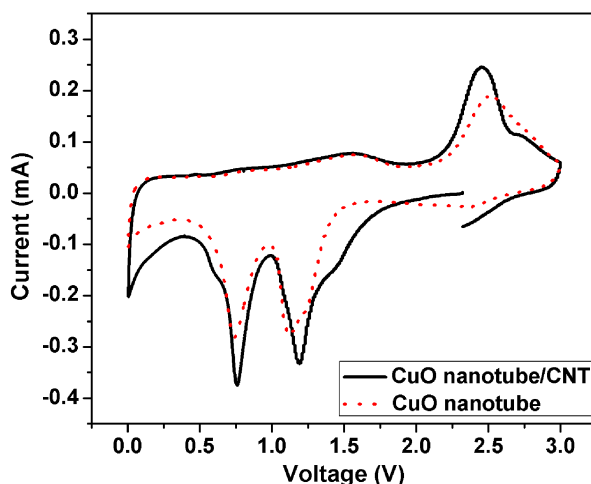

Figure S1 Cyclic voltammograms of the electrodes made of CuO nanotubes and CuO nanotube/CNT composites at a potential scan rate of 0.5 mV/s.

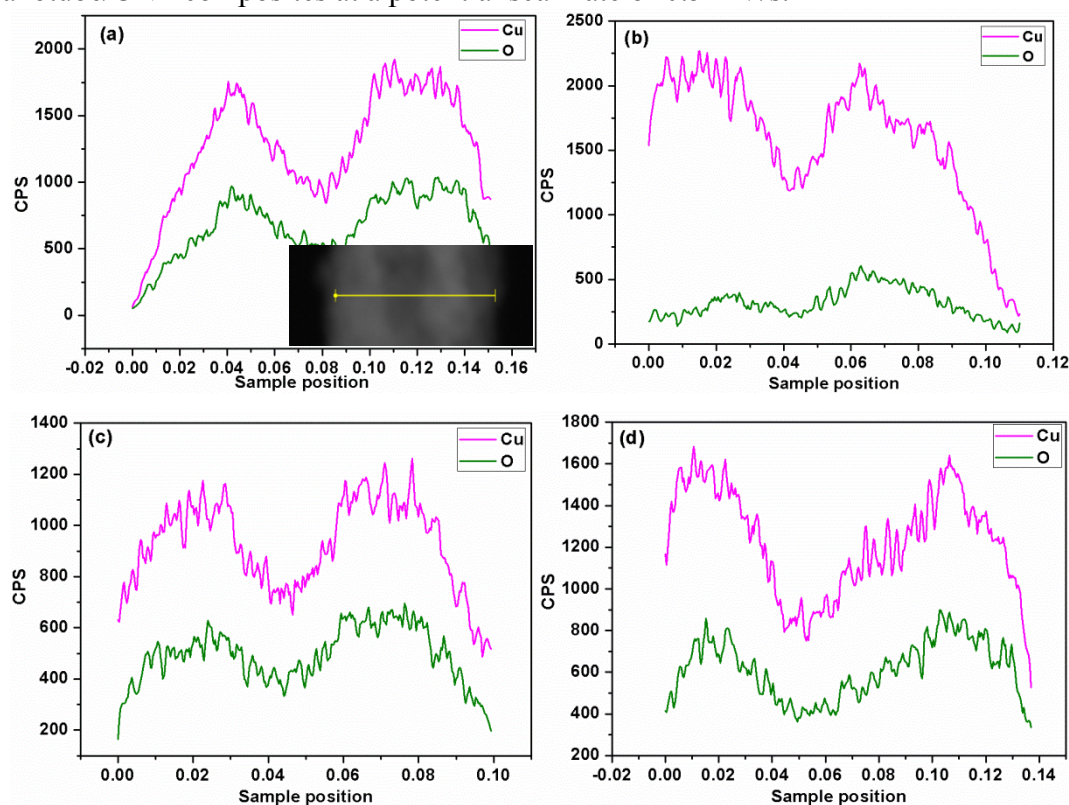

Figure S2 Elemental analysis of a single CuO nanotube before and after H<sub>2</sub> plasma treatment by STEM (a) a CuO nanotube, the inset is the transmitting electron image of a part of a CuO nanotube, and the elemental analysis was conducted by scanning across the nanotube; (b) a CuO nanotube after H<sub>2</sub> plasma treatment for 5 min; (c) a CuO nanotube covered with CNTs; (d) a CuO nanotube covered with CNTs after H<sub>2</sub> plasma treatment for 5 min. The valley in the center area is caused by the tube structure of CuO.

Supplementary Material (ESI) for Nanoscale  
This journal is (c) The Royal Society of Chemistry 2010

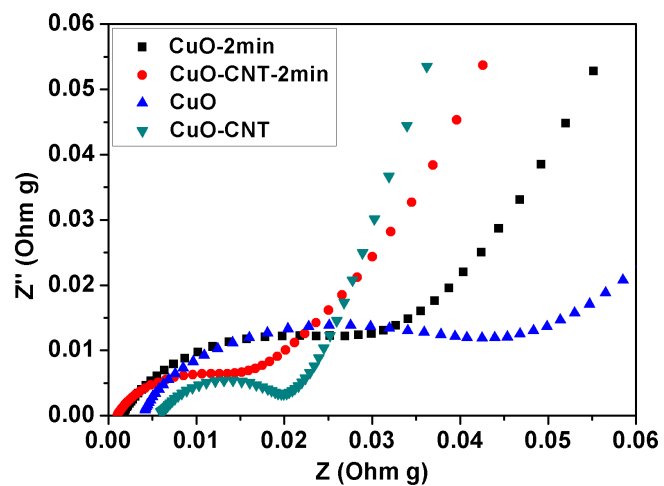

Figure S3 Impedance measurement of the electrode made of CuO nanotube, CuO nanotube-CNT composite, and their electrode treated with H<sub>2</sub> plasma for 2 min.

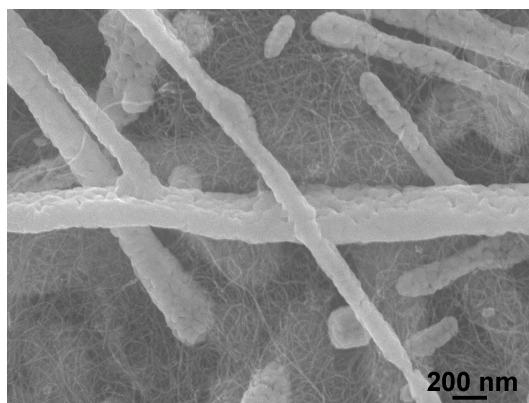

Figure S4 SEM image of CuO nanotube-CNT composite electrode treated with H<sub>2</sub> plasma for 5 min
